# Supplementary material for: Affordability and availability of off-patent drugs in the United States—the case for importing from abroad: observational study
Source: PubMed Central journal article supplement — BMJ. 2018 Mar 19;360:k831. doi: 10.1136/bmj.k831 (PMC5858606; doi:10.1136/bmj.k831), 2018-03-19
Supplement: gupr040790.ww.pdf [file gupr040790.ww.pdf]

**APPENDIX - DRUGS WITH MANUFACTURERS**

| Drug with Original FDA-approved Manufacturer |            |                                               | Generic Manufacturers                                   |                                                                                                                                                                                  |                         |                  |                       |                                   |                            |                        |                                               |
|----------------------------------------------|------------|-----------------------------------------------|---------------------------------------------------------|----------------------------------------------------------------------------------------------------------------------------------------------------------------------------------|-------------------------|------------------|-----------------------|-----------------------------------|----------------------------|------------------------|-----------------------------------------------|
| Active Ingredients                           | Trade Name | Original Manufacturer (US/FDA)                | US (FDA)                                                | Canada (Health Canada)                                                                                                                                                           | EU (EMA)                | Australia (TGA)  | New Zealand (Medsafe) | Switzerland (Swiss Medic)         | Israel                     | South Africa           | Notes                                         |
| ACAMPROSATE CALCIUM                          | CAMPRAL    | FOREST LABORATORIES INC                       | MYLAN PHARMS INC, GLENMARK GENERICS, BARR LABS DIV TEVA |                                                                                                                                                                                  |                         |                  |                       | MERCK*                            |                            | MERCK*                 |                                               |
| ACEBUTOLOL HYDROCHLORIDE                     | SECTRAL    | PROMIUS PHARMA LLC                            | AMNEAL PHARM, MYLAN PHARMS INC                          |                                                                                                                                                                                  |                         |                  |                       |                                   |                            | SANOFI                 |                                               |
| ACETOHYDROXAMIC ACID                         | LITHOSTAT  | MISSION PHARMA                                |                                                         |                                                                                                                                                                                  |                         |                  |                       |                                   |                            |                        |                                               |
| ADEFOVIR DIPIVOXIL                           | HEPSERA    | GILEAD SCIENCES INC                           | SIGMAPHARM LABS LLC                                     | APOTEX*                                                                                                                                                                          |                         | APOTEX*          | APOTEX*               |                                   | GSK***                     |                        | GSK licensed from Gilead                      |
| ALBENDAZOLE                                  | ALBENZA    | AMEDRA                                        |                                                         |                                                                                                                                                                                  |                         | ASPEN***         |                       |                                   | GSK***                     | BE TABS, CIPLA, GSK*** | GSK gave Aspen products including albendazole |
| ALMOTRIPTAN MALATE                           | AXERT      | JANSSEN PHARMACEUTICALS INC                   | TEVA PHARMS USA, AJANTA PHARM LTD, MYLAN PHARMS INC     | SANDOZ, PHARMASCIENCE, APOTEX, PRO DOC                                                                                                                                           |                         |                  |                       | ALMIRALL                          |                            |                        |                                               |
| ALOSETRON HYDROCHLORIDE                      | LOTRONEX   | PROMETHEUS LABORATORIES INC                   | AMNEAL PHARMS, WEST-WARD PHARMS INT                     |                                                                                                                                                                                  |                         |                  |                       |                                   |                            |                        |                                               |
| ALTRETAMINE                                  | HEXALEN    | EISAI                                         |                                                         |                                                                                                                                                                                  |                         |                  |                       |                                   |                            |                        |                                               |
| AMILORIDE HYDROCHLORIDE                      | MIDAMOR    | PADDOCK LLC                                   | ZYDUS PHARMS USA INC, SIGMAPHARM LABS LLC, PAR PHARM    | AA PHARMA INC, ORBUS PHARMA INC                                                                                                                                                  |                         | ALPHAPHARM       | APOTEX NZ             |                                   |                            |                        |                                               |
| AMINOCAPROIC ACID                            | AMICAR     | CLOVER PHARMS                                 | AKORN                                                   |                                                                                                                                                                                  |                         |                  |                       |                                   |                            |                        |                                               |
| AMOXAPINE                                    | ASENDIN    | LEDERLE                                       | WATSON LABS                                             |                                                                                                                                                                                  |                         |                  |                       |                                   |                            |                        |                                               |
| APREPITANT                                   | EMEND      | MERCK AND CO INC                              | SANDOZ                                                  |                                                                                                                                                                                  |                         |                  |                       |                                   |                            |                        |                                               |
| ATROPINE SULFATE; DIFENOXIN HYDROCHLORIDE    | MOTOFEN    | SEBELA IRELAND LTD                            |                                                         |                                                                                                                                                                                  |                         |                  |                       |                                   |                            |                        |                                               |
| AURANOFIN                                    | RIDAURA    | SEBELA IRELAND LTD                            |                                                         | XEDITON PHARMS                                                                                                                                                                   |                         | AMDIPHAM MERCURY |                       |                                   |                            |                        |                                               |
| BALSALAZIDE DISODIUM                         | COLAZAL    | VALEANT PHARMACEUTICALS INTERNATIONAL         | WEST-WARD PHARMS INT, APOTEX INC, MYLAN                 |                                                                                                                                                                                  |                         | FRESENIUS KABI   |                       |                                   |                            |                        |                                               |
| BEXAROTENE                                   | TARGRETIN  | VALEANT PHARMACEUTICALS LUXEMBOURG SARL       | BIONPHARMA INC                                          |                                                                                                                                                                                  |                         |                  |                       |                                   |                            |                        |                                               |
| BUMETANIDE                                   | BUMEX      | VALIDUS PHARMS INC                            | SANDOZ, IVAX SUB TEVA PHARMS                            | LEO PHARMA*/***                                                                                                                                                                  |                         | CSL LIMITED***   | LEO PHARMA*           |                                   |                            | ADCOCK INGRAM LIMITED  | CSL received licenses from Leo                |
| BUSULFAN                                     | MYLERAN    | ASPEN GLOBAL                                  |                                                         |                                                                                                                                                                                  | FRESENIUS KABI ONCOLOGY |                  |                       |                                   | PERRIGO ISRAEL             |                        |                                               |
| CANDESARTAN CILEXETIL                        | ATACAND    | ASTRAZENECA PHARMACEUTICALS LP                | SANDOZ, APOTEX INC, MACLEODS PHARMS LTD                 | ACCORD, ALEMBIC, AURO, BIOMED, JAMP PHARMA, JUBILANT GENERICS, LABORATOIRE RIVA, MARCAN, MYLAN*/**, PHARMAPAR, PHARMASCIENCE, PRO DOC, RANBAXY, SANIS, SEPTA, SIVEM, TEVA, ZINDA |                         | ALPHAPHARM**     | DOUGLAS, MYLAN*/**    | TAKEDA, HELVEPHARM, SPIRIG, MEPHA | LASARA, RANBAXY, MYLAN*/** |                        | Alphapharm is owned by Mylan.                 |
| CEFACLOR                                     | CECLOR     | LILLY                                         | YUNG SHIN PHARM, HIKMA                                  | APOTEX INC, TEVA CANADA LIMITED                                                                                                                                                  |                         |                  | DOUGLAS               |                                   |                            |                        |                                               |
| CEFIXIME                                     | SUPRAX     | LEDERLE LABORATORIES DIV AMERICAN CYANAMID CO | LUPIN PHARMS                                            | SANOFI-AVENTIS, AURO                                                                                                                                                             |                         |                  |                       |                                   |                            | MERCK                  |                                               |

**APPENDIX - DRUGS WITH MANUFACTURERS**

| Drug with Original FDA-approved Manufacturer |            |                                | Generic Manufacturers                     |                                                                                                  |          |                                           |                                                      |                           |                |                                                              |                                                           |
|----------------------------------------------|------------|--------------------------------|-------------------------------------------|--------------------------------------------------------------------------------------------------|----------|-------------------------------------------|------------------------------------------------------|---------------------------|----------------|--------------------------------------------------------------|-----------------------------------------------------------|
| Active Ingredients                           | Trade Name | Original Manufacturer (US/FDA) | US (FDA)                                  | Canada (Health Canada)                                                                           | EU (EMA) | Australia (TGA)                           | New Zealand (Medsafe)                                | Switzerland (Swiss Medic) | Israel         | South Africa                                                 | Notes                                                     |
| CEFPODOXIME PROXETIL                         | VANTIN     | PHARMACIA AND UPJOHN CO        | AUROBINDO PHARMA, SANDOZ, ORCHID HLTHCARE |                                                                                                  |          |                                           |                                                      | DAIICHI SANKYO            |                | SANOFI AVENTIS, PHARMA DYNAMICS, PHARMACARE LIMITED, RANBAXY |                                                           |
| CHENODIOL                                    | CHENIX     | LEADIANT BIOSCI INC            | NEXGEN PHARMA                             |                                                                                                  |          |                                           |                                                      |                           |                |                                                              |                                                           |
| CHLORAMBUCIL                                 | LEUKERAN   | ASPEN GLOBAL INC               |                                           |                                                                                                  |          |                                           |                                                      |                           | PERRIGO ISRAEL |                                                              |                                                           |
| CHLORDIAZEPOXIDE HYDROCHLORIDE               | LIBRIUM    | VALEANT PHARM INTL             | BARR, USL PHARMA, VALEANT PHARM INTL      |                                                                                                  |          |                                           |                                                      |                           |                | MEDA PHARMA                                                  |                                                           |
| CHLOROTHIAZIDE                               | DIURIL     | OAK PHARMS AKORN               | MYLAN                                     |                                                                                                  |          |                                           |                                                      |                           |                |                                                              |                                                           |
| CHLORPROMAZINE HYDROCHLORIDE                 | THORAZINE  | GLAXOSMITHKLINE                | USL PHARMA                                | TEVA CANADA                                                                                      |          |                                           | SANOFI AVENTIS*                                      |                           |                | SANOFI AVENTIS*                                              |                                                           |
| CHLORPROPAMIDE                               | DIABINESE  | PFIZER                         | MYLAN, ANI PHARMS INC                     | APOTEX INC                                                                                       |          |                                           |                                                      |                           |                | THEBE, PHARMACARE LIMITED WOODMEAD                           |                                                           |
| CHLORTHALIDONE                               | HYGROTON   | SANOFI AVENTIS US              | MYLAN, SUN PHARM INDS                     | AA PHARMA INC, APOTEX INC, VALEANT CANADA                                                        |          | AMDIPHARM MERCURY (AUSTRALIA) PTY LIMITED | AFT PHARMACEUTICALS                                  |                           |                |                                                              |                                                           |
| CHLORTHALIDONE; CLONIDINE HYDROCHLORIDE      | COMBIPRES  | BOEHRINGER INGELHEIM           | MYLAN                                     |                                                                                                  |          |                                           |                                                      |                           |                |                                                              |                                                           |
| CLEMASTINE FUMARATE                          | TAVIST-1   | NOVARTIS                       | TEVA                                      |                                                                                                  |          |                                           |                                                      | GSK                       |                |                                                              |                                                           |
| CLOFAZIMINE                                  | LAMPRENE   | Novartis                       |                                           |                                                                                                  |          |                                           |                                                      |                           |                |                                                              |                                                           |
| CLOMIPHENE CITRATE                           | CLOMID     | SANOFI AVENTIS US              | PAR PHARM                                 | EMD SERONO**                                                                                     |          | MERCK SERONO AUSTRALIA**                  | PHARMACY RETAILING (NZ) LTD                          |                           |                | CIPLA MEDPRO, GULF DRUG COMPANY                              | EMD Serono and Merck Serono Australia both owned by Merck |
| CYCLOSERINE                                  | SEROMYCIN  | PURDUE GMP                     |                                           |                                                                                                  |          |                                           |                                                      |                           |                |                                                              |                                                           |
| DANAZOL                                      | DANOCRINE  | SANOFI AVENTIS US              | LANNETT, BARR                             |                                                                                                  |          | ALPHAPHARM PTY LTD**                      | MYLAN NEW ZEALAND**                                  |                           |                | ADOCK INGRAM LIMITED, CIPLA MEDPRO                           | Alphapharm is owned by Mylan                              |
| DANTROLENE SODIUM                            | DANTRIUM   | PAR STERILE PRODUCTS           | ELITE LABS INC, IMPAX LABS                |                                                                                                  |          | PFIZER*                                   | PFIZER NEW ZEALAND*                                  | NORGINE                   |                | PHARMACO DISTRIBUTION                                        |                                                           |
| DEXAMETHASONE                                | DECADRON   | MERCK                          | WEST-WARD PHARMS INT, ECR, PAR PHARM      | APOTEX, DOMINION PHARMACAL, PHARMEL INC, PHARMASCIENCE INC, PRO DOC LIMITEE, TEVA CANADA LIMITED |          | ASPEN                                     | PHARMACY RETAILING (NZ) LTD, DOUGLAS PHARMACEUTICALS | GALEPHARM                 | REKAH          |                                                              |                                                           |
| DICHLORPHENAMIDE                             | KEVEYIS    | STRONGBRIDGE US                |                                           |                                                                                                  |          |                                           |                                                      |                           |                |                                                              |                                                           |
| DICYCLOMINE HYDROCHLORIDE                    | BENTYL     | FOREST LABS INC                | MYLAN, WATSON LABS, LANNETT               |                                                                                                  |          |                                           |                                                      |                           |                |                                                              |                                                           |
| DIETHYLPROPION HYDROCHLORIDE                 | TENUATE    | ACTAVIS LABS UT INC            | LANNETT HOLDINGS INC, AVANTHI INC         |                                                                                                  |          |                                           |                                                      |                           |                | ADCOCK INGRAM LIMITED                                        |                                                           |
| DIFLUNISAL                                   | DOLOBID    | MERCK                          | HERITAGE PHARMA, TEVA                     | AA PHARMA INC                                                                                    |          |                                           |                                                      |                           |                |                                                              |                                                           |

**APPENDIX - DRUGS WITH MANUFACTURERS**

| Drug with Original FDA-approved Manufacturer |            |                                                 | Generic Manufacturers                      |                                                                |          |                             |                             |                           |          |                       |                                 |
|----------------------------------------------|------------|-------------------------------------------------|--------------------------------------------|----------------------------------------------------------------|----------|-----------------------------|-----------------------------|---------------------------|----------|-----------------------|---------------------------------|
| Active Ingredients                           | Trade Name | Original Manufacturer (US/FDA)                  | US (FDA)                                   | Canada (Health Canada)                                         | EU (EMA) | Australia (TGA)             | New Zealand (Medsafe)       | Switzerland (Swiss Medic) | Israel   | South Africa          | Notes                           |
| DILTIAZEM HYDROCHLORIDE                      | CARDIZEM   | VALEANT INTL                                    | TEVA, MYLAN                                | PENTAPHARM LTD, APOTEX INC                                     |          | AMNEAL, SANDOZ, SANOFI      | DOUGLAS PHARMACEUTICALS     |                           | RAFA     | ADCOCK INGRAM LIMITED |                                 |
| DIPHENHYDRAMINE HYDROCHLORIDE                | BENADRYL   | MCNEIL CONS                                     | BARR                                       |                                                                |          |                             | PHARMACO (NZ) LTD           |                           |          | PFIZER                |                                 |
| DISOPYRAMIDE PHOSPHATE                       | NORPACE    | GD SEARLE LLC                                   | MAYNE PHARMA, TEVA                         |                                                                |          |                             | SANOFI AVENTIS*             |                           | UNIPHARM | SANOFI AVENTIS*       |                                 |
| DOLASETRON MESYLATE                          | ANZEMET    | US Pharm Holdings                               |                                            |                                                                |          |                             |                             |                           |          | SANOFI AVENTIS SA     |                                 |
| DOXEPIN HYDROCHLORIDE                        | SINEQUAN   | PFIZER                                          | MYLAN PHARMS INC, PAR PHARM                | APOTEX INC, TEVA CANADA LIMITED, ASPRI PHARMA CANADA INC       |          |                             |                             |                           | REKAH    |                       |                                 |
| DOXERCALCIFEROL                              | HECTOROL   | GENZYME CORP                                    | RISING PHARMS INC, WEST-WARD PHARMS        |                                                                |          |                             |                             |                           |          |                       |                                 |
| DRONABINOL                                   | MARINOL    | ABBVIE INC                                      | AKORN INC, SVC PHARMA                      |                                                                |          |                             |                             |                           |          |                       |                                 |
| EPLERENONE                                   | INSPIRA    | GD SEARLE LLC                                   | APOTEX, SANDOZ, MYLAN PHARMS INC           |                                                                |          | AMNEAL PHARMA, ARROW PHARMA | TE ARAL BIOFARMA            | MEPHA, SPIRIG             | INOVAMED |                       |                                 |
| EPROSARTAN MESYLATE                          | TEVETEN    | ABBVIE INC                                      | MYLAN PHARMS INC                           |                                                                |          |                             |                             | MEPHA                     |          |                       |                                 |
| ESTAZOLAM                                    | PROSOM     | ABBOTT LABORATORIES PHARMACEUTICAL PRODUCTS DIV | MAYNE PHARMA, WATSON LABS, PAR PHARM       |                                                                |          |                             |                             |                           |          |                       |                                 |
| ESTRAMUSTINE PHOSPHATE SODIUM                | EMCYT      | PHARMACIA AND UPJOHN                            |                                            |                                                                |          |                             |                             |                           |          |                       |                                 |
| ESTROGENS, CONJUGATED                        | PREMARIN   | WYETH PHARMS INC                                |                                            | VALEANT CANADA LP, LABORATOIRES TRIANON INC, PHARMASCIENCE INC |          |                             |                             |                           |          |                       |                                 |
| ETHACRYNIC ACID                              | EDECIN     | ATON                                            | EDENBRIDGE PHARMS, WEST-WARD PHARMS        |                                                                |          | A. MENARINI AUSTRALIA       |                             |                           |          |                       |                                 |
| ETHAMBUTOL HYDROCHLORIDE                     | MYAMBUTOL  | STI PHARMA LLC                                  | BARR, LUPIN, AKORN                         | VALEANT CANADA LP                                              |          | ASPEN PHARMA                |                             | LABATEC PHARMA            |          | SANDOZ                |                                 |
| ETHINYL ESTRADIOL; NORGESTREL                | OVRAL      | WYETH PHARMS                                    | DURAMED PHARMS BARR                        |                                                                |          |                             |                             | EFFIK                     |          | TRINITY PHARMA        |                                 |
| ETHIONAMIDE                                  | TRECTOR    | WYETH PHARMS INC                                |                                            |                                                                |          |                             |                             |                           |          | SANOFI                |                                 |
| ETHOSUXIMIDE                                 | ZARONTIN   | PARKE DAVIS                                     | HERITAGE PHARMS INC, BIONPHARMA INC, AKORN | ERFA CANADA 2012 INC                                           |          | CLINECT PTY LTD*            | CLINECT NZ PTY LTD*         | ORION                     |          |                       |                                 |
| ETHOTOIN                                     | PEGANONE   | RECORDATI RARE                                  |                                            |                                                                |          |                             |                             |                           |          |                       |                                 |
| ETIDRONATE DISODIUM                          | DIDRONEL   | APIL                                            | MYLAN                                      | ACTAVIS PHARMA**, APOTEX INC                                   |          |                             | TEVA PHARMA (NEW ZEALAND)** |                           |          |                       | Actavis Pharma is owned by Teva |
| ETODOLAC                                     | LODINE     | WYETH PHARMACEUTICALS INC                       | ANI PHARMS INC, APOTEX, TARO               | AA PHARMA INC, NOVOPHARM LIMITED                               |          |                             |                             |                           |          |                       |                                 |

**APPENDIX - DRUGS WITH MANUFACTURERS**

| Drug with Original FDA-approved Manufacturer      |                      |                                | Generic Manufacturers                                |                                                                  |          |                                                               |                             |                           |                                                |                                                    |                                                                         |
|---------------------------------------------------|----------------------|--------------------------------|------------------------------------------------------|------------------------------------------------------------------|----------|---------------------------------------------------------------|-----------------------------|---------------------------|------------------------------------------------|----------------------------------------------------|-------------------------------------------------------------------------|
| Active Ingredients                                | Trade Name           | Original Manufacturer (US/FDA) | US (FDA)                                             | Canada (Health Canada)                                           | EU (EMA) | Australia (TGA)                                               | New Zealand (Medsafe)       | Switzerland (Swiss Medic) | Israel                                         | South Africa                                       | Notes                                                                   |
| EXEMESTANE                                        | AROMASIN             | PHARMACIA AND UPJOHN CO        | ALVOGEN MALTA, MYLAN PHARMS INC, WESTWARD PHARMS INT | APOTEX, GENERIC MEDICAL PARTNERS, TEVA*                          |          | ACCORD, AMNEAL, GENERIC HEALTH, JUNO, SANDOZ*, SOUTHERN CROSS | DOUGLAS                     | PARSENN-PRODUKTE, SANDOZ* | VITAMED, DEVRIES, TARO, TRIMA, TEVA*, INOVAMED | EQUITY                                             |                                                                         |
| FELBAMATE                                         | FELBATOL             | MEDA PHARMACEUTICALS INC       | AMNEAL PHARMS, ALVOGEN PHARMS, IMPAX LABS INC        |                                                                  |          |                                                               |                             | MSD                       |                                                |                                                    |                                                                         |
| FENOPROFEN CALCIUM                                | NALFON               | XSPIRE                         |                                                      |                                                                  |          |                                                               |                             |                           |                                                |                                                    |                                                                         |
| FERRIC HEXACYANOFERRATE (II)                      | OGARDASE (PRUSSIAN B | Heyl Chemisch                  |                                                      |                                                                  |          |                                                               |                             |                           |                                                |                                                    |                                                                         |
| FLAVOXATE HYDROCHLORIDE                           | URISPAS              | ORTHO MCNEIL JANSSEN           | PADDOCK LLC, EPIC PHARMA                             | APOTEX INC, PALADIN LABS INC                                     |          |                                                               |                             | RECORDATI                 |                                                | ADCOCK INGRAM LIMITED                              |                                                                         |
| FLUCYTOSINE                                       | ANCOBON              | VALEANT                        | SIGMAPHARM LABS LLC                                  |                                                                  |          |                                                               |                             |                           |                                                |                                                    |                                                                         |
| FLUOXYMESTERONE                                   | HALOTESTIN           | PHARMACIA AND UPJOHN           | USL PHARMA                                           |                                                                  |          |                                                               |                             |                           |                                                |                                                    |                                                                         |
| FLUPHENAZINE HYDROCHLORIDE                        | PERMITIL             | SCHERING                       | LANNETT, MYLAN, SANDOZ                               | APOTEX INC, AA PHARMA INC, PHARMASCIENCE INC                     |          |                                                               |                             |                           |                                                |                                                    |                                                                         |
| FLURAZEPAM HYDROCHLORIDE                          | DALMANE              | VALEANT PHARM INTL             | MYLAN PHARMS INC                                     | AA PHARMA INC, BIOMED PHARMA, PHARMASCIENCE INC, PRO DOC LIMITEE |          |                                                               |                             |                           |                                                |                                                    |                                                                         |
| FLUVASTATIN SODIUM                                | LESCOL               | NOVARTIS PHARMACEUTICALS CORP  | TEVA PHARMS, MYLAN PHARMS INC                        |                                                                  |          |                                                               |                             |                           |                                                |                                                    |                                                                         |
| FROVATRIPTAN SUCCINATE                            | FROVA                | ENDO PHARMACEUTICALS INC       | GLENMARK PHARMS LTD, MYLAN PHARMS INC                | APOTEX INC                                                       |          |                                                               |                             | PRO FARMA                 |                                                |                                                    |                                                                         |
| GUANABENZ ACETATE                                 | WYTENSIN             | WYETH AYERST                   | ANI PHARMS INC                                       |                                                                  |          |                                                               |                             |                           |                                                |                                                    |                                                                         |
| HALOPERIDOL                                       | HALDOL               | ORTHO MCNEIL                   | MYLAN, ZYDUS PHARMS USA, SANDOZ                      | APOTEX INC, TEVA CANADA LIMITED                                  |          | ASPEN PHARMA**                                                | PHARMACY RETAILING (NZ)**   |                           | CTS CHEMICAL                                   | GULF DRUG COMPANY, PFIZER                          | Pharmacy Retailing (NZ) is owned by Aspen.                              |
| HOMATROPINE METHYLBROMIDE; HYDROCODONE BITARTRATE | HYCODAN              | ENDO PHARMS                    | KING PHARMS, NOVEL LABS INC                          |                                                                  |          |                                                               |                             |                           |                                                |                                                    |                                                                         |
| HYDROFLU-METHIAZIDE                               | SALURON              | SHIRE LLC                      |                                                      |                                                                  |          |                                                               |                             |                           |                                                |                                                    |                                                                         |
| HYDROXYUREA                                       | DROXIA               | BRISTOL MYERS SQUIBB           | BARR, PAR PHARM                                      | APOTEX INC, SANIS HEALTH INC, MYLAN PHARMACEUTICALS              |          |                                                               |                             |                           |                                                |                                                    |                                                                         |
| ISOCARBOXAZID                                     | MARPLAN              | VALIDUS PHARMS INC             |                                                      |                                                                  |          |                                                               |                             |                           |                                                |                                                    |                                                                         |
| ISOSORBIDE DINITRATE                              | ISORDIL              | VALEANT PHARMS NORTH           | SANDOZ, HIKMA INTL PHARMS, PAR PHARM                 |                                                                  |          | ARROW PHARMA                                                  | PHARMACY RETAILING (NZ)**   | CPS CITO                  |                                                | GLAXOSMITHKLINE SOUTH AFRICA, PHARMACARE LIMITED** | Pharmacy Retailing (NZ) and Pharmacare Limited are both owned by Aspen. |
| ISOSORBIDE MONONITRATE                            | ISMO                 | PROMIUS PHARMA LLC             | HIKMA PHARMS LLC, ANI PHARMS INC, ACTAVIS ELIZABETH  |                                                                  |          | ALPHAPHARM**, APOTEX, ASTRAZENECA                             | MYLAN**, PHARMACY RETAILING |                           | DEXCEL                                         | GLAXOSMITHKLINE                                    | Alphapharm is owned by Mylan.                                           |

**APPENDIX - DRUGS WITH MANUFACTURERS**

| Drug with Original FDA-approved Manufacturer |                          |                                                        | Generic Manufacturers                                   |                                        |          |                                                 |                                       |                                                     |                |                                                                  |                                                                    |
|----------------------------------------------|--------------------------|--------------------------------------------------------|---------------------------------------------------------|----------------------------------------|----------|-------------------------------------------------|---------------------------------------|-----------------------------------------------------|----------------|------------------------------------------------------------------|--------------------------------------------------------------------|
| Active Ingredients                           | Trade Name               | Original Manufacturer (US/FDA)                         | US (FDA)                                                | Canada (Health Canada)                 | EU (EMA) | Australia (TGA)                                 | New Zealand (Medsafe)                 | Switzerland (Swiss Medic)                           | Israel         | South Africa                                                     | Notes                                                              |
| ISRADIPINE                                   | DYNACIRC                 | SMITHKLINE BEECHAM CORP DBA GLAXOSMITHKLINE            | ELITE LABS INC, WATSON LABS                             |                                        |          |                                                 | NOVARTIS*                             | DAIICHI SANKYO                                      |                | NOVARTIS*                                                        |                                                                    |
| IVERMECTIN                                   | STROMECTOL               | MERCK SHARP AND DOHME CORP                             | EDENBRIDGE PHARMS                                       |                                        |          |                                                 |                                       |                                                     |                |                                                                  |                                                                    |
| KETOCONAZOLE                                 | NIZORAL                  | JANSSEN PHARMS                                         | TARO, MYLAN, TEVA                                       | APOTEX                                 |          |                                                 |                                       |                                                     |                | PHARMACARE LIMITED WOODMEAD, SANDOZ                              |                                                                    |
| KETOPROFEN                                   | ORUDIS                   | WYETH AYERST LABORATORIES                              | TEVA, MYLAN, HERITAGE PHARMS INC                        | PHARMASCIENCE, AA PHARMA INC           |          |                                                 |                                       |                                                     |                | ADCOCK INGRAM LIMITED                                            |                                                                    |
| LEVOCARNITINE                                | CARNITOR                 | SIGMA TAU PHARMACEUTICALS INC                          | IMPAX LABS INC                                          |                                        |          |                                                 |                                       |                                                     |                |                                                                  |                                                                    |
| LOMUSTINE                                    | GLEOSTINE                | CORDEN PHARMA                                          |                                                         |                                        |          |                                                 |                                       |                                                     |                |                                                                  |                                                                    |
| LOPERAMIDE HYDROCHLORIDE                     | IMODIUM                  | J AND J CONSUMER INC                                   | MYLAN, TEVA                                             |                                        |          | PHARMACORE PTY LIMITED, ASPEN PHARMA            |                                       | AMAVITA, COOP VITALITY, HELVEPHARM, SANDOZ, STREULI | RAFA, VITAMED  |                                                                  |                                                                    |
| MAPROTIline HYDROCHLORIDE                    | LUDIOMIL                 | NOVARTIS                                               | MYLAN                                                   | PHARMASCIENCE INC, TEVA CANADA LIMITED |          |                                                 | AFT PHARMACEUTICALS                   |                                                     | UNIPHARM       | PHARMACO DISTRIBUTION                                            |                                                                    |
| MEBENDAZOLE                                  | VERMOX                   | JANSSEN PHARMS                                         | AMEDRA PHARMS LLC                                       |                                        |          | GENERIC HEALTH PTY LTD, INOVA PHARMACEUTICALS** | MULTICHEM NZ LIMITED, BAUSCH & LOMB** |                                                     |                | ADCOCK INGRAM LIMITED, BE TABS, CIPLA MEDPRO, PHARMACARE, SANDOZ | iNova Pharmaceuticals and Bausch & Lomb are both owned by Valeant. |
| MECAMYLAMINE HYDROCHLORIDE                   | INVERSINE                | TARGACEPT                                              | NEXGEN PHARMA                                           |                                        |          |                                                 |                                       |                                                     |                |                                                                  |                                                                    |
| MECLOFENAMATE SODIUM                         | MECLOMEN                 | PARKE DAVIS                                            | MYLAN                                                   |                                        |          |                                                 |                                       |                                                     |                |                                                                  |                                                                    |
| MEDROXYPROGESTERONE ACETATE                  | PROVERA                  | PHARMACIA AND UPJOHN                                   | BARR                                                    | APOTEX, PRO DOC LIMITEE                |          |                                                 |                                       |                                                     |                |                                                                  |                                                                    |
| MEFLOQUINE HYDROCHLORIDE                     | MEFLOQUINE HYDROCHLORIDE | UNITED STATES ARMY WALTER REED ARMY INSTITUTE RESEARCH | WEST-WARD PHARMS INT, SANDOZ, BARR                      | AA PHARMA INC                          |          | ROCHE PRODUCTS*                                 | ROCHE PRODUCTS*                       | ACINO, MEPHA                                        | ROCHE*         | CIPLA MEDPRO, ROCHE*                                             |                                                                    |
| MEGESTROL ACETATE                            | MEGACE                   | BRISTOL MYERS SQUIBB                                   | BARR, PAR PHARM, WEST-WARD PHARMS INT                   | APOTEX INC*, AA PHARMA INC             |          | ASPEN PHARMA**                                  | APOTEX NZ*, PHARMACY RETAILING**      |                                                     |                |                                                                  | Aspen Pharma owns Pharmacy Retailing.                              |
| MELPHALAN                                    | ALKERAN                  | APOTEX INC                                             | ALVOGEN MALTA                                           | ASPEN PHARMACARE CANADA INC*/**        |          | ASPEN PHARMA*/**                                | PHARMACY RETAILING (NZ)**             | ASPEN*/**                                           | PERRIGO ISRAEL | PHARMACARE LIMITED**                                             | Aspen owns both Pharmacy Retailing (NZ) and Pharmacare Limited.    |
| MEPENZOLATE BROMIDE                          | CANTIL                   | SANOI AVENTIS US                                       |                                                         |                                        |          |                                                 |                                       |                                                     |                |                                                                  |                                                                    |
| MEPROBAMATE                                  | EQUANIL                  | WYETH AYERST                                           | WATSON LABS, ALEMBIC PHARMS LTD, INVAGEN PHARMS         |                                        |          |                                                 |                                       |                                                     |                | PHARMACARE LIMITED                                               |                                                                    |
| MERCAPTOPURINE                               | PURINETHOL               | STASON PHARMS                                          | MYLAN, WEST-WARD PHARMS INT, DR REDDYS LABS INTL        | STERIMAX INC, TEVA CANADA LIMITED      |          | ASPEN PHARMA**                                  | PHARMACY RETAILING (NZ)**             |                                                     | PERRIGO ISRAEL | PHARMACARE LIMITED**                                             | Aspen owns both Pharmacy Retailing (NZ) and Pharmacare Limited.    |
| METHOXSALEN                                  | 8-MOP                    | VALEANT PHARM INTL                                     | ACTAVIS INC, STRIDES PHARMA                             |                                        |          |                                                 |                                       |                                                     |                | MEDA PHARMA                                                      |                                                                    |
| METHSCOPOLAMINE BROMIDE                      | PAMINE                   | FOUGERA PHARMS                                         | BRECKENRIDGE PHARM, BAYSHORE PHARMS LLC, VINTAGE PHARMS |                                        |          |                                                 |                                       |                                                     |                |                                                                  |                                                                    |
| METHSUXIMIDE                                 | CELONTIN                 | PARKE DAVIS                                            |                                                         |                                        |          |                                                 |                                       |                                                     |                |                                                                  |                                                                    |

**APPENDIX - DRUGS WITH MANUFACTURERS**

| Drug with Original FDA-approved Manufacturer |            |                                                           | Generic Manufacturers                       |                                                                                                                      |                   |                  |                         |                           |              |                                                              |       |
|----------------------------------------------|------------|-----------------------------------------------------------|---------------------------------------------|----------------------------------------------------------------------------------------------------------------------|-------------------|------------------|-------------------------|---------------------------|--------------|--------------------------------------------------------------|-------|
| Active Ingredients                           | Trade Name | Original Manufacturer (US/FDA)                            | US (FDA)                                    | Canada (Health Canada)                                                                                               | EU (EMA)          | Australia (TGA)  | New Zealand (Medsafe)   | Switzerland (Swiss Medic) | Israel       | South Africa                                                 | Notes |
| METHYLCLOTHIAZIDE                            | ENDURON    | ABBVIE                                                    | MYLAN PHARMS INC                            |                                                                                                                      |                   |                  |                         |                           |              |                                                              |       |
| METOLAZONE                                   | ZAROXOLYN  | UCB INC                                                   | MYLAN, SANDOZ                               | SANOFI-AVENTIS CANADA INC                                                                                            |                   |                  |                         | GALEPHARM                 |              |                                                              |       |
| METYRAPONE                                   | METOPIRONE | HRA PHARMA                                                |                                             |                                                                                                                      |                   |                  | PHARMACY RETAILING (NZ) |                           |              |                                                              |       |
| METYROSINE                                   | DEMSEK     | ATON PHARMA VPNA                                          |                                             |                                                                                                                      |                   |                  |                         |                           |              |                                                              |       |
| MEXILETINE HYDROCHLORIDE                     | MEXITIL    | BOEHRINGER INGELHEIM                                      | TEVA                                        |                                                                                                                      |                   |                  |                         |                           |              |                                                              |       |
| MIGLITOL                                     | GLYSET     | PHARMACIA AND UPJOHN CO                                   | OREINT PHARMA CO LTD                        |                                                                                                                      |                   |                  |                         |                           |              |                                                              |       |
| MIGLUSTAT                                    | ZAVESCA    | ACTELION PHARMS                                           |                                             | SANDOZ CANADA                                                                                                        |                   |                  | PHARMACY RETAILING      |                           |              |                                                              |       |
| MISOPROSTOL                                  | CYTOTEC    | GD SEARLE LLC                                             | IVAX SUB TEVA PHARMS, NOVEL LABS INC        | AA PHARMA, PHARMASCIENCE                                                                                             |                   |                  |                         | NORDIC                    |              |                                                              |       |
| MITOTANE                                     | LYSODREN   | BRISTOL MYERS SQUIBB                                      |                                             |                                                                                                                      |                   |                  |                         | HRA-PHARMA                |              |                                                              |       |
| MOLINDONE HYDROCHLORIDE                      | MOBAN      | ENDO PHARMS                                               | COREPHARMA                                  |                                                                                                                      |                   |                  |                         |                           |              |                                                              |       |
| NABILONE                                     | CESAMET    | MEDA PHARMS                                               |                                             | APOTEX, PHARMASCIENCE, RANBAXY, TEVA                                                                                 |                   |                  |                         |                           |              |                                                              |       |
| NEFAZODONE HYDROCHLORIDE                     | SERZONE    | BRISTOL MYERS SQUIBB CO PHARMACEUTICAL RESEARCH INSTITUTE | TEVA, DR REDDYS LABS INC                    |                                                                                                                      |                   |                  |                         |                           |              |                                                              |       |
| NELFINAVIR MESYLATE                          | VIRACEPT   | AGOURON PHARMS                                            |                                             |                                                                                                                      |                   |                  |                         |                           |              | ROCHE                                                        |       |
| NICARDIPINE HYDROCHLORIDE                    | CARDENE    | CHIESI USA INC                                            | EPIC PHARMA, MYLAN, ANI PHARMS INC          |                                                                                                                      |                   |                  |                         |                           |              |                                                              |       |
| NILUTAMIDE                                   | NILANDRON  | CONCORDIA PHARMS                                          | ANI PHARMS INC                              |                                                                                                                      |                   |                  |                         |                           |              |                                                              |       |
| NISOLDIPINE                                  | SULAR      | SHIONOGI INC                                              | MYLAN                                       |                                                                                                                      |                   |                  | BAYER NZ                |                           |              |                                                              |       |
| NITISINONE                                   | ORFADIN    | SWEDISH ORPHAN                                            |                                             | CYCLE PHARMA, MEDELIKABS                                                                                             |                   | MENARINI AUS     |                         |                           | MEGAPHARM    |                                                              |       |
| OLSALAZINE SODIUM                            | DIPENTUM   | MEDA PHARMS                                               |                                             | ATNAHS PHARMA UK LTD*                                                                                                |                   | ATNAHS PHARMA*   | CLINECT NZ (EBOS GROUP) |                           |              | AHN PHARMA                                                   |       |
| OSELTAMIVIR PHOSPHATE                        | TAMIFLU    | HOFFMANN LA ROCHE INC                                     | NESHER PHARMS, NATCO PHARMA LTD             |                                                                                                                      | ACTAVIS GROUP PTC |                  |                         |                           |              | CIPLA LIFE SCIENCES                                          |       |
| OXANDROLONE                                  | OXANDRIN   | GEMINI LABS LLC                                           | PAR PHARM, UPSHER SMITH                     |                                                                                                                      |                   |                  |                         |                           |              |                                                              |       |
| OXAZEPAM                                     | SERAX      | ALPHARMA US PHARMS                                        | SANDOZ, ACTAVIS ELIZABETH                   |                                                                                                                      |                   |                  |                         |                           | RAFA         |                                                              |       |
| OXYBUTYRIN CHLORIDE                          | DITROPAN   | JANSSEN PHARMS                                            | VINTAGE PHARMS, USL PHARMA, TEVA PHARMS USA | APOTEX INC*, LABORATOIRE RIVA INC, PENTAPHARM LTD, SANIS HEALTH INC, PHARMASCIENCE INC, PHARMEL INC, PRO DOC LIMITEE |                   | SANOFI*, SANDOZ* | APOTEX NZ*              | SANOFI*                   | CTS CHEMICAL | IPHARMA, MYLAN, PHARMACARE LIMITED, SANDOZ*, SANOFI AVENTIS* |       |
| PALIPERIDONE                                 | INVEGA     | JANSSEN PHARMACEUTICALS INC                               | ACTAVIS LABS FL INC, MYLAN PHARMS INC       |                                                                                                                      |                   |                  |                         |                           |              |                                                              |       |
| PENICILLAMINE                                | CUPRIMINE  | ATON                                                      |                                             |                                                                                                                      |                   |                  |                         |                           |              | ABBOTT LABORATORIES                                          |       |
| PENTOSAN POLYSULFATE SODIUM                  | ELMIRON    | JANSSEN PHARMS                                            |                                             |                                                                                                                      |                   | ARTHROPHARM      |                         |                           |              |                                                              |       |

**APPENDIX - DRUGS WITH MANUFACTURERS**

| Drug with Original FDA-approved Manufacturer |                            |                                           | Generic Manufacturers                              |                                                                                               |          |                                           |                           |                           |                |                                                                   |                                                                         |
|----------------------------------------------|----------------------------|-------------------------------------------|----------------------------------------------------|-----------------------------------------------------------------------------------------------|----------|-------------------------------------------|---------------------------|---------------------------|----------------|-------------------------------------------------------------------|-------------------------------------------------------------------------|
| Active Ingredients                           | Trade Name                 | Original Manufacturer (US/FDA)            | US (FDA)                                           | Canada (Health Canada)                                                                        | EU (EMA) | Australia (TGA)                           | New Zealand (Medsafe)     | Switzerland (Swiss Medic) | Israel         | South Africa                                                      | Notes                                                                   |
| PHENELZINE SULFATE                           | NARDIL                     | PARKE DAVIS                               | NOVEL LABS INC                                     | ERFA CANADA 2012 INC                                                                          |          | LINK MEDICAL PRODUCTS*                    | LINK PHARMACEUTICALS*     |                           |                |                                                                   |                                                                         |
| PHENOXYBENZAMINE HYDROCHLORIDE               | DIBENZYLIN                 | CONCORDIA PHARMS INC                      | WEST-WARD PHARMS INT, PAR PHARM INC                |                                                                                               |          |                                           |                           |                           | RAFA           |                                                                   |                                                                         |
| PIMOZIDE                                     | ORAP                       | TEVA                                      | PAR PHARM                                          | AA PHARMA INC, PHARMASCIENCE INC                                                              |          |                                           |                           |                           | JANNSEN-CILAG* | JANNSEN PHARMACEUTICA *                                           |                                                                         |
| PINDOLOL                                     | VISKEN                     | NOVARTIS                                  | SUN PHARM INDS, MYLAN PHARMS INC, NOSTRUM LABS INC | APOTEX INC*, PHARMASCIENCE INC, PRO DOC LIMITEE, TEVA CANADA LIMITED, TRIBUTE PHARMACEUTICALS |          |                                           | APOTEX NZ*                |                           |                |                                                                   |                                                                         |
| PRAZIQUANTEL                                 | BILTRICIDE                 | BAYER HLTHCARE                            |                                                    |                                                                                               |          |                                           |                           |                           |                | MERCK                                                             |                                                                         |
| PRAZOSIN HYDROCHLORIDE                       | MINIPRESS                  | PFIZER                                    | IVAX SUB TEVA PHARMS, MYLAN, TEVA PHARMS           |                                                                                               |          |                                           |                           |                           |                |                                                                   |                                                                         |
| PREDNISOLONE                                 | DELTA-CORTEF               | PHARMACIA AND UPJOHN                      | WATSON LABS                                        |                                                                                               |          | ASPEN PHARMACARE**, INOVA PHARMACEUTICALS |                           | STREULI, SPIRIG           |                | ADCOCK INGRAM LIMITED, CAPS PHARMACEUTICALS, PHARMACARE LIMITED** | Pharmacare Limited is owned by Aspen.                                   |
| PROBENECID                                   | BENEMID                    | MERCK                                     | LANNETT, MYLAN, WATSON LABS                        |                                                                                               |          | THE TRUSTEE FOR VIRGO UNIT TRUST (PHEBRA) | AFT PHARMACEUTICALS       | LIPROMED                  |                | PHARMACARE LIMITED                                                |                                                                         |
| PROCARBAZINE HYDROCHLORIDE                   | MATULANE                   | LEADIANT BIOSCI INC                       |                                                    |                                                                                               |          |                                           |                           |                           |                |                                                                   |                                                                         |
| PROPANTHELINE BROMIDE                        | PRO-BANTHINE               | SHIRE                                     | WEST-WARD PHARMS INT                               |                                                                                               |          | ARROW PHARMA                              | PHARMACY RETAILING (NZ)** |                           |                | PHARMACARE LIMITED**                                              | Pharmacy Retailing (NZ) and Pharmacare Limited are both owned by Aspen. |
| PYRIDOSTIGMINE BROMIDE                       | MESTINON                   | VALEANT PHARMS LLC                        | ZYDUS PHARMS USA INC, IMPAX LABS                   |                                                                                               |          |                                           |                           |                           | RAFA           |                                                                   |                                                                         |
| PYRIMETHAMINE                                | DARAPRIM                   | TURING PHARMS AG                          |                                                    |                                                                                               |          | ARROW PHARMA                              |                           | GSK*                      |                | GLAXOSMITHKLINE SOUTH AFRICA*,                                    |                                                                         |
| RASAGILINE MESYLATE                          | AZILECT                    | TEVA NEUROSCIENCE INC                     | ORCHID HLTHCARE, WATSON LABS INC, APOTEX INC       |                                                                                               |          |                                           |                           | SANDOZ                    | TRIMA          |                                                                   |                                                                         |
| RIFABUTIN                                    | MYCOBUTIN                  | PHARMACIA AND UPJOHN CO                   | LUPIN LTD                                          |                                                                                               |          |                                           |                           |                           |                |                                                                   |                                                                         |
| RIFAPENTINE                                  | PRIFTIN                    | SANOI AVENTIS US                          |                                                    |                                                                                               |          |                                           |                           |                           |                |                                                                   |                                                                         |
| RIMANTADINE HYDROCHLORIDE                    | FLUMADINE                  | CARACO PHARMACEUTICAL LABORATORIES LTD    | IMPAX LABS                                         |                                                                                               |          |                                           |                           |                           |                |                                                                   |                                                                         |
| SELEGILINE HYDROCHLORIDE                     | SELEGILINE HYDROCHLORIDE   | SOMERSET PHARMACEUTICALS INC              | MYLAN, STASON, APOTEX INC                          | TEVA CANADA LIMITED                                                                           |          | ASPEN PHARMACARE**                        |                           |                           | CTS CHEMICAL   | PHARMACARE LIMITED**                                              | Pharmacare Limited is owned by Aspen.                                   |
| SODIUM IODIDE I-123 SUCCIMER                 | SODIUM IODIDE I 123 CHEMET | GE HEALTHCARE RECORDATI RARE              | MALLINKRODT NUCLEAR                                |                                                                                               |          | ANSTO                                     |                           |                           | ELDAN          | RADIOISOTOPES                                                     |                                                                         |
| SUCRALFATE                                   | CARAFATE                   | FOREST LABS INC                           | MYLAN IRELAND LTD, TEVA                            | APOTEX, PHARMASCIENCE INC                                                                     |          | ASPEN PHARMACARE**                        | PHARMACY RETAILING (NZ)** |                           |                |                                                                   | Pharmacy Retailing (NZ) is owned by Aspen.                              |
| SULFASALAZINE                                | AZULFIDINE                 | PHARMACIA AND UPJOHN                      | VINTAGE PHARMS, WATSON LABS                        | APOTEX INC, PHARMASCIENCE INC                                                                 |          |                                           |                           |                           |                |                                                                   |                                                                         |
| TETRABENZAZINE                               | XENAZINE                   | VALEANT PHARMACEUTICALS NORTH AMERICA LLC | SUN PHARMA GLOBAL, HETERO LABS LTD V, APICORE US   | APOTEX, PHARMASCIENCE, STERIMAX                                                               |          |                                           | AFT, DOUGLAS              | CURATIS                   | MEGAPHARM      |                                                                   |                                                                         |

**APPENDIX - DRUGS WITH MANUFACTURERS**

| Drug with Original FDA-approved Manufacturer                      |             |                                           | Generic Manufacturers                        |                                                                |          |                    |                                     |                           |                |                                  |                                                                         |
|-------------------------------------------------------------------|-------------|-------------------------------------------|----------------------------------------------|----------------------------------------------------------------|----------|--------------------|-------------------------------------|---------------------------|----------------|----------------------------------|-------------------------------------------------------------------------|
| Active Ingredients                                                | Trade Name  | Original Manufacturer (US/FDA)            | US (FDA)                                     | Canada (Health Canada)                                         | EU (EMA) | Australia (TGA)    | New Zealand (Medsafe)               | Switzerland (Swiss Medic) | Israel         | South Africa                     | Notes                                                                   |
| THIOGUANINE                                                       | THIOGUANINE | ASPEN GLOBAL INC                          |                                              |                                                                |          | ASPEN PHARMACARE** | PHARMACY RETAILING (NZ)**           |                           | PERRIGO ISRAEL | PHARMACARE LIMITED**             | Pharmacy Retailing (NZ) and Pharmacare Limited are both owned by Aspen. |
| THIORIDAZINE HYDROCHLORIDE                                        | MELLARIL    | NOVARTIS                                  | MYLAN, SUN PHARMS INDS                       |                                                                |          |                    |                                     |                           | TARO           |                                  |                                                                         |
| THIOTHIXENE                                                       | NAVANE      | PFIZER                                    | MYLAN                                        | ERFA CANADA 2012 INC                                           |          |                    |                                     |                           |                |                                  |                                                                         |
| TIAGABINE HYDROCHLORIDE                                           | GABITRIL    | CEPHALON INC                              | SUN PHARM INDS                               |                                                                |          | ORPHAN AUS         |                                     |                           |                |                                  |                                                                         |
| TICLOPIDINE HYDROCHLORIDE                                         | TICLID      | ROCHE PALO ALTO LLC                       | TEVA, APOTEX, SUN PHAR INDS INC              |                                                                |          | ALPHAPHARM         |                                     |                           |                |                                  |                                                                         |
| TIOPRONIN                                                         | THIOLA      | MISSION PHARMA                            |                                              |                                                                |          |                    |                                     |                           |                |                                  |                                                                         |
| TOLAZAMIDE                                                        | TOLINASE    | PHARMACIA AND UPJOHN                      | MYLAN PHARMS INC                             |                                                                |          |                    |                                     |                           |                |                                  |                                                                         |
| TOLCAPONE                                                         | TASMAR      | VALEANT PHARMACEUTICALS NORTH AMERICA LLC | PAR PHARM INC                                |                                                                |          |                    |                                     |                           |                |                                  |                                                                         |
| TOLMETIN SODIUM                                                   | TOLECTIN    | ORTHO MCNEIL JANSSEN                      | MYLAN, SUN PHARM INDS                        |                                                                |          |                    |                                     |                           |                |                                  |                                                                         |
| TOREMIFENE CITRATE                                                | FARESTON    | KYOWA KIRIN                               |                                              |                                                                |          | ASPEN              |                                     |                           |                | MERCK SHARP & DOHME              |                                                                         |
| TRANEXAMIC ACID                                                   | CYKLOKAPRON | PHARMACIA AND UPJOHN CO                   | ACTAVIS LABS FL INC, APOTEX INC, MYLAN       | STERIMAX                                                       |          |                    | BOUCHER & MUIR                      |                           |                | DR REDDY'S, MEDWICH, PHARMAFRICA |                                                                         |
| TRANLYCPROMINE SULFATE                                            | PARNATE     | CONCORDIA PHARMS INC                      | PAR PHARM                                    | GLAXOSMITHKLINE                                                |          |                    |                                     |                           |                | PHARMAFRICA                      |                                                                         |
| TRIAMTERENE                                                       | DYRENIUM    | CONCORDIA PHARMS INC                      |                                              |                                                                |          |                    |                                     |                           |                |                                  |                                                                         |
| TRIAZOLAM                                                         | HALCION     | PHARMACIA AND UPJOHN                      | MYLAN PHARMS INC, WEST-WARD PHARMS INT       | PENTRAPHARM LTD, AA PHARMA INC                                 |          |                    | VALEANT PHARMACEUTICALS NEW ZEALAND |                           |                |                                  |                                                                         |
| TRIENTINE HYDROCHLORIDE                                           | SYPRINE     | ATON                                      |                                              |                                                                |          |                    |                                     |                           |                |                                  |                                                                         |
| TRIFLUOPERAZINE HYDROCHLORIDE                                     | STELAZINE   | GLAXOSMITHKLINE                           | MYLAN, SANDOZ                                | AA PHARMA INC                                                  |          | AMDIPHARM MERCURY  |                                     |                           |                | PHARMAFRICA                      |                                                                         |
| TRIMIPRAMINE MALEATE                                              | SURMONTIL   | ODYSSEY PHARMS                            | CROSSMEDIKA SA, MIKAH PHARMA                 | APOTEX INC, AA PHARMA INC                                      |          |                    | PHARMACY RETAILING (NZ)**           | SANOFI, SANDOZ            |                | PHARMACARE LIMITED**             | Pharmacy Retailing (NZ) and Pharmacare Limited are both owned by Aspen. |
| UREA, C-14                                                        | PYTEST      | AVENT                                     |                                              |                                                                |          | TRI-MED, VITRAMED  |                                     |                           |                | LEBASI PHARMA                    |                                                                         |
| VALPROIC ACID                                                     | DEPAKENE    | ABBVIE                                    | CATALENT, BIONPHARMA INC, SUN PHARM INDS LTD | PENTAPHARM LTD, APOTEX INC, BGP PHARMA ULC, DOMINION PHARMACAL |          | SANOFI AVENTIS     |                                     | ORION                     | TEVA           | TAKEDA                           |                                                                         |
| ZAFIRLUKAST                                                       | ACCOLATE    | PAR PHARMACEUTICAL INC                    | DR REDDYS LABS LTD                           |                                                                |          |                    |                                     |                           |                |                                  |                                                                         |
| ZIDOVDINE                                                         | RETROVIR    | VIIV HEALTHCARE CO                        | CIPLA LTD, AUROBINDO PHARMA LTD              | APOTEX                                                         |          |                    |                                     |                           |                | ADCOCK INGRAM                    |                                                                         |
| ZILEUTON                                                          | ZYFLO       | CHIESI USA                                |                                              |                                                                |          |                    |                                     |                           |                |                                  |                                                                         |
| * - same manufacturer (same name)                                 |             |                                           |                                              |                                                                |          |                    |                                     |                           |                |                                  |                                                                         |
| ** - same manufacturer (different name), through ownership chains |             |                                           |                                              |                                                                |          |                    |                                     |                           |                |                                  |                                                                         |
| *** - licensing agreement exists with other manufacturer          |             |                                           |                                              |                                                                |          |                    |                                     |                           |                |                                  |                                                                         |
